# Supplementary material for: Proper gibberellin localization in vascular tissue is required to regulate adventitious root development in tobacco
Source: PubMed Central journal article supplement — J Exp Bot. 2013 Jul 30;64(11):3411–24. doi: 10.1093/jxb/ert186 (PMC3733162; doi:10.1093/jxb/ert186), 2013-07-30

**Table S1** Sequence information of PCR primers used for plasmid construction and qRT-PCR

| Purpose                            | Name        | Sequence (5'-3')                                      |
|------------------------------------|-------------|-------------------------------------------------------|
| d1- <i>LMX5</i>                    | LMX5        | F (KpnI) GTT <u>GGTACCG</u> ATGCAAAAAGCTGGAATGAG      |
|                                    |             | R (BamHI) GTTGGATCCGAGAAGAAGGTGTTTGG                  |
| d1- <i>TobRB7</i>                  | TobRB7      | F (KpnI) GTT <u>GGTACC</u> TTTTAGAATGCGT              |
|                                    |             | R (BamHI) GTTGGATCCCTCACTAGAAAAATGC                   |
| d1- <i>Promoter::<br/>NOS</i>      | NOS Ter     | F (MluI) CAC <u>ACGCGT</u> TCCCCGATCGTTCAAACATTTGGCA  |
|                                    |             | R (Sall) CGCGT <u>CGACCG</u> TTGATGAAGCTAATTCCTCGATCT |
| <i>Promoter::<br/>PtGA20ox-NOS</i> | PtGA20ox    | F (BamHI) GTT <u>GGATCC</u> ATGGCAATAGATTGCATCA       |
|                                    |             | R (MluI) CAC <u>ACGCGT</u> TTCAGCTAAAACCTTCGTTGATG    |
| <i>Promoter::<br/>PtGA2ox1-NOS</i> | PtGA2ox1    | F (BamHI) GTTGGATCCATGGTTCTCGTGACAAGCCAG              |
|                                    |             | R (MluI) CAC <u>ACGCGT</u> CGAGGCTGCTATTCTCTCG        |
| 35S:: <i>PtGAI-NOS</i>             | GAI         | F (BamHI) GTTGGATCCATGAAAAGAGAACACTCAAATCTCC          |
|                                    |             | R (MluI) CAC <u>ACGCGT</u> AGCAGCACCACCTACTGG         |
| qRT-PCR                            | RT-NtActin  | F AATTGCTGATAGGATGAGTAAGGA                            |
|                                    |             | R CCTTTGCAATCCACATCTGTT                               |
| qRT-PCR                            | RT-PtGA2ox1 | F CACAAGCCAGCACTTCAACAG                               |
|                                    |             | R ATGCCTTAACCAGGAGGTGC                                |
| qRT-PCR                            | RT-PtGA20ox | F CACCCAAAAGATCAGGATCAAT                              |
|                                    |             | R GAGGAAATCACCCAAGTCTACAA                             |
| qRT-PCR                            | RT-PtGAI    | F CCGACCACAAACATCATCAG                                |
|                                    |             | R GGCCATTAAGAGATGGACGA                                |
| qRT-PCR                            | RT-NtGA2ox1 | F ATTGGACCCAATGGCGATGT                                |
|                                    |             | R TGCAGCCCGAATTGTTTCTG                                |
| qRT-PCR                            | RT-NtGA20ox | F TGCCAGAAACCAGACCTCAC                                |
|                                    |             | R CAAAACTTGAAGCCCGCCA                                 |

Restriction enzyme sites are indicated by underlines.

**Fig. S1.** Phenotypic characterisation of WT and transgenic plants grown in greenhouse.

Seventy day-old wild-type and transgenic plants grown in greenhouse were pictured.

Bar = 10 cm.

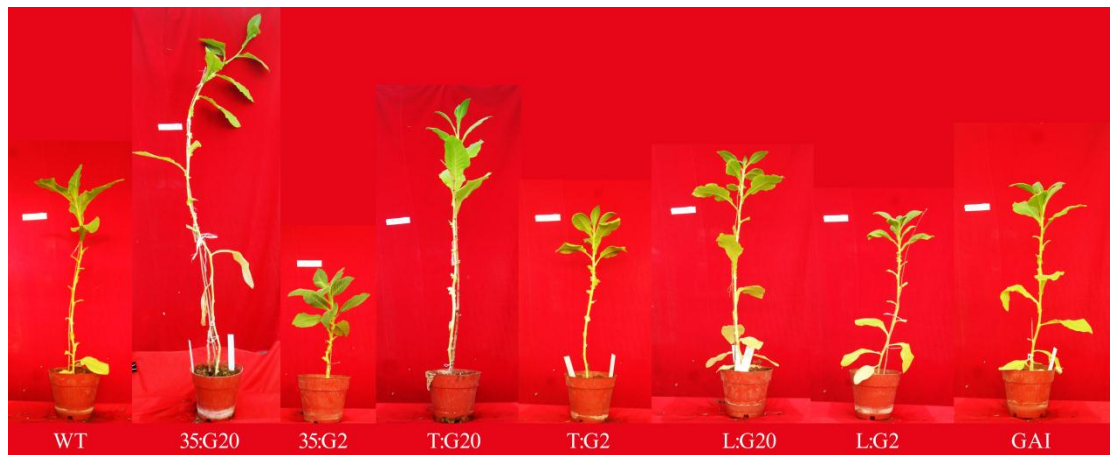

**Fig. S2.** Gibberellin concentrations in leaves, stems, and roots of wild-type and transgenic tobacco.

Wild-type and transgenic plants were grown *in vitro* on hormone-free medium for 4 weeks. GA concentrations in stems, roots and leaves were assessed using an LC-MS system. Values are means  $\pm$  SE of three biological replicates

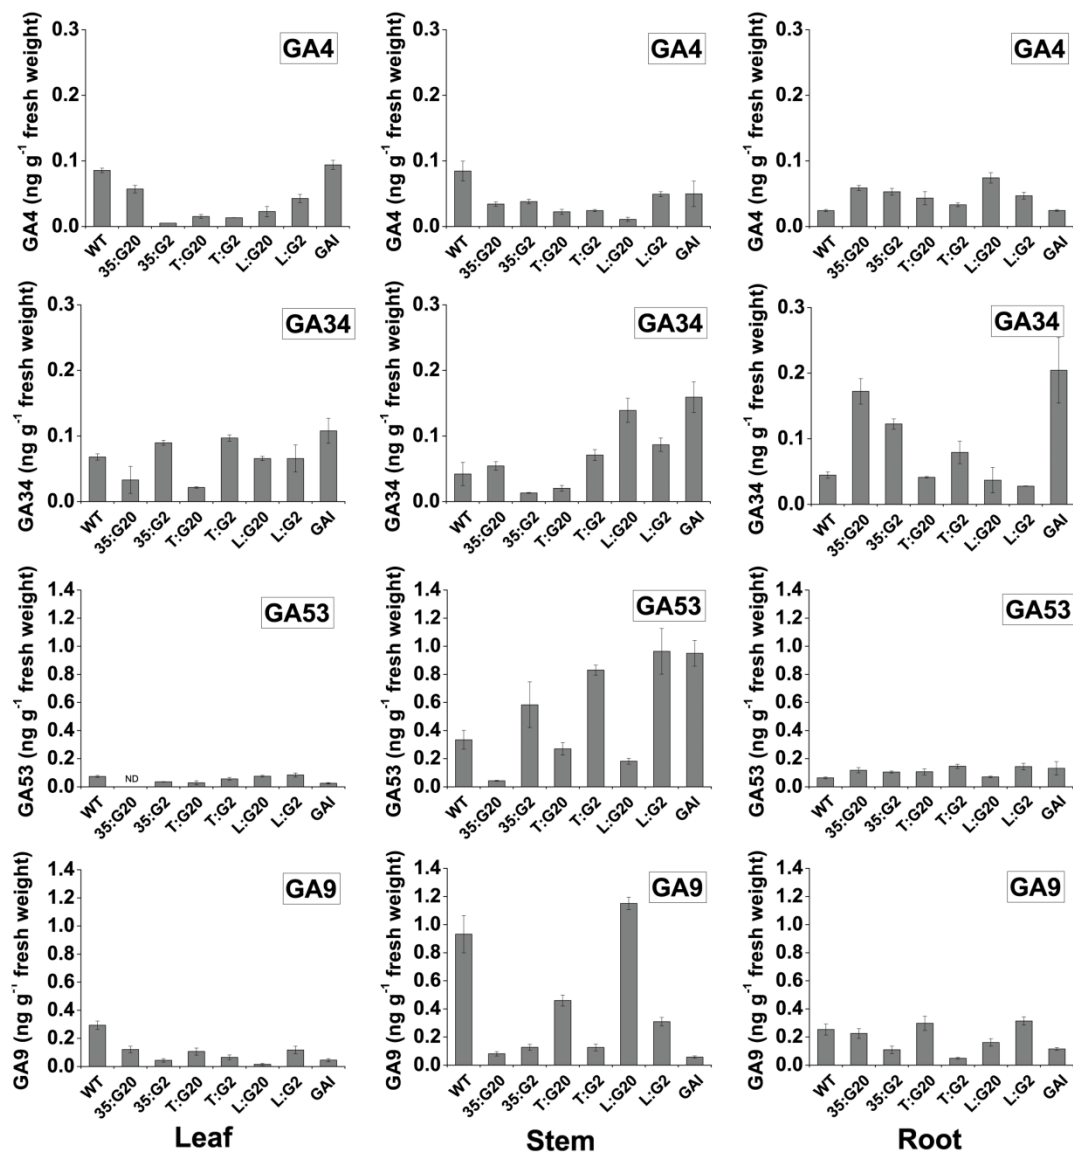

**Fig. S3.** The effects of excision of developing and mature leaves on stem elongation.

Wild-type and transgenic plants were grown *in vitro* on hormone-free medium for 4 weeks. The plants on the right of each line had their developing and mature leaves excised every 3 days. Bar = 10 cm.

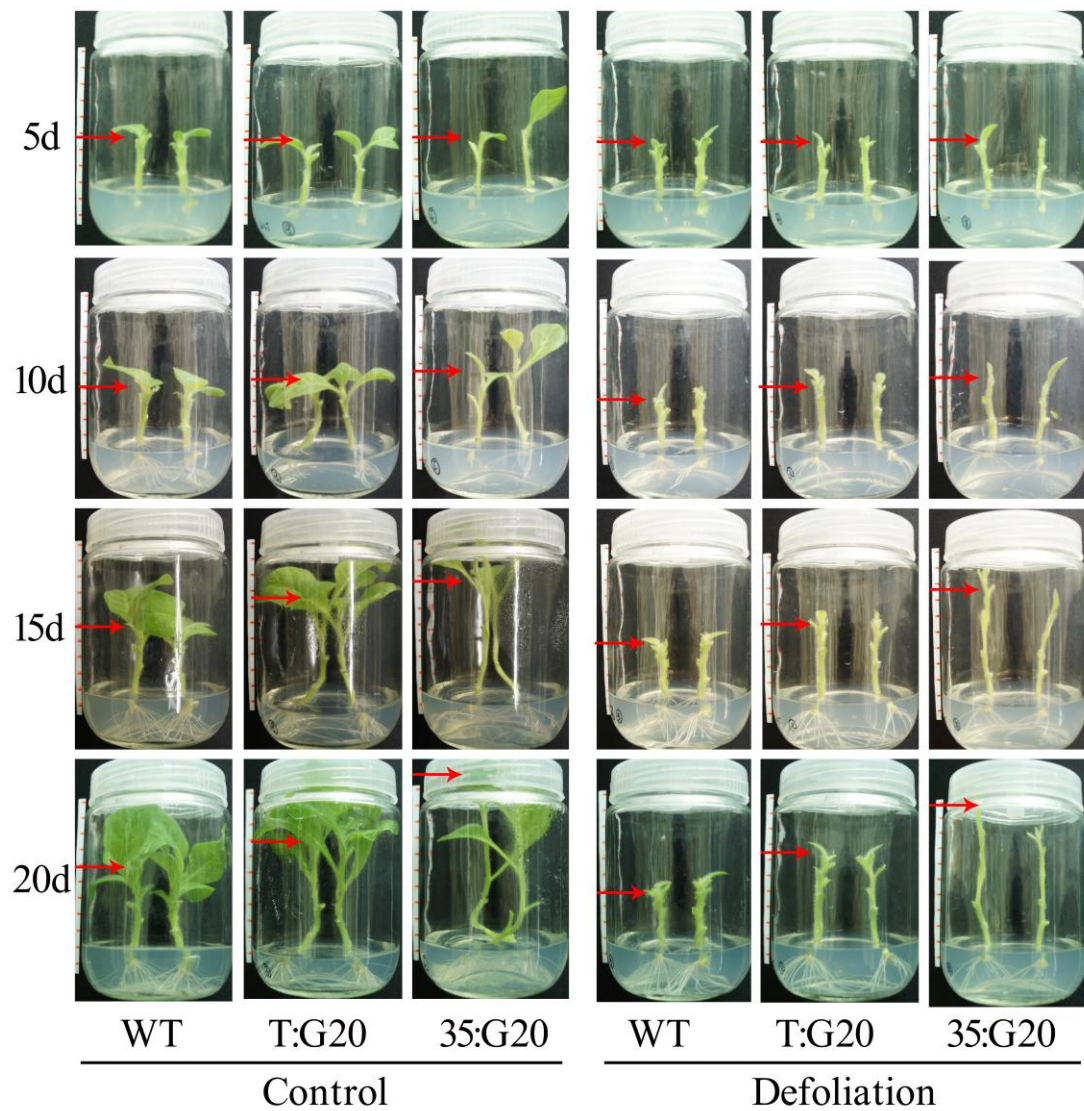

**Fig. S4.** The high level of IAA or NAA and GA arrest adventitious root formation with more callus formation at the base of the stem cutting.

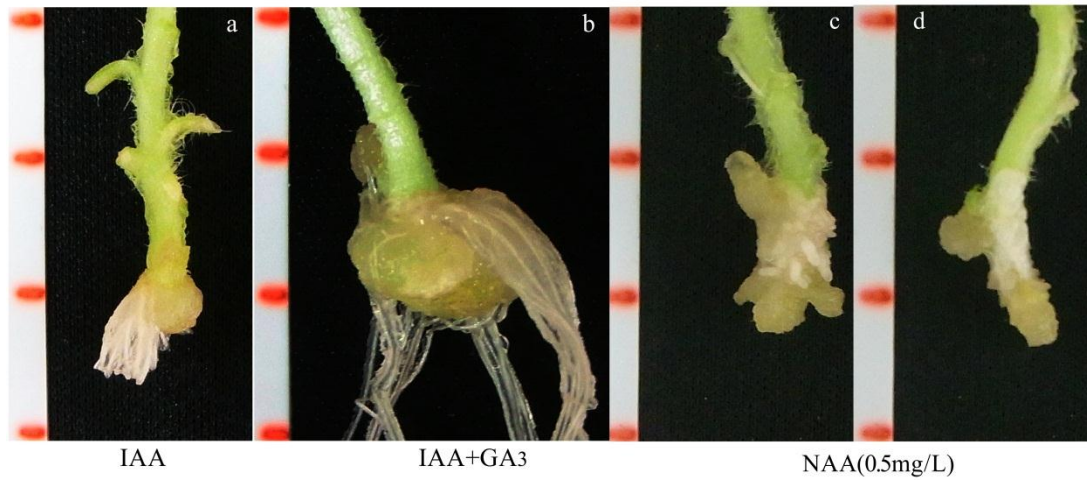

**Fig. S5.** The formation of adventitious roots from petioles and midvein sections of WT, 35:G20 and 35:G2 plants pre-cultured in GA<sub>3</sub> or PAC-containing media.

The petioles and midvein sections from WT, 35:G20 and 35:G2 plants pre-cultured in GA<sub>3</sub> or PAC-containing media for 2 weeks were cut into 10-mm-long segments and cultured 3 weeks on MS medium. The concentrations of IAA, GA<sub>3</sub> and PAC were each 1 mg L<sup>-1</sup>.

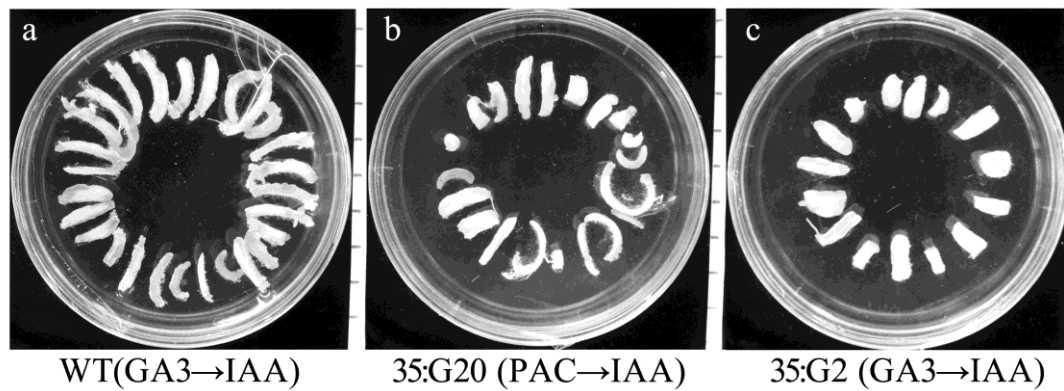

Supplement: supp_ert186_jexbot090860_file001.pdf [file supp_ert186_jexbot090860_file001.pdf]
